# Supplementary material
Source: PubMed Central journal article supplement (PMC8608701)
Supplement: NIHMS1730938-supplement-Supplemental_Publication_Material.pdf [file NIHMS1730938-supplement-Supplemental_Publication_Material.pdf]

SUPPLEMENTAL MATERIAL

Supplemental Figure and Figure Legend

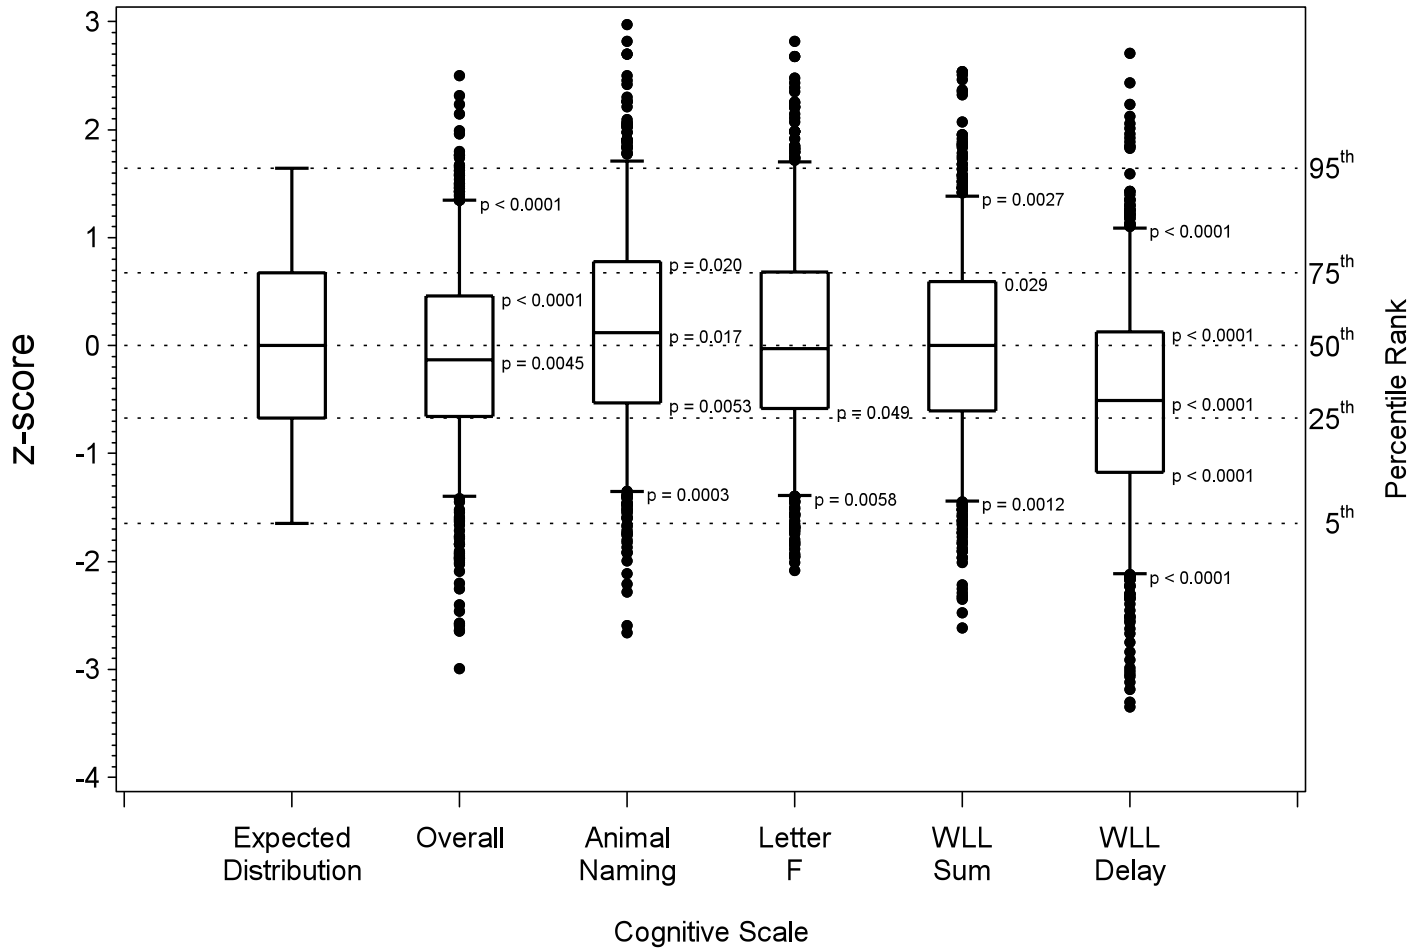

Figure I: Baseline cognitive performance for Crest-2 with risk-factor adjustment: Box-and-whisker plots showing the distribution of cognitive performance in the CREST- 2 value where scores are standardized using the general population values from the REGARDS population, and after adjustment for hypertension, diabetes, dyslipidemia and smoking. The box-and-whisker plot is drawn with the box showing the 25th and 75th percentiles, the line within the box the 50th percentile, the whiskers the 5th and 95th percentiles, and observations below the 5th percentile or above the 95th percentile.
